# Supplementary material
Source: PubMed Central journal article supplement (PMC3251056)
Supplement: 1108754108_pnas.201108754SI.pdf [file 1108754108_pnas.201108754SI.pdf]

# Supporting Information

Das et al. 10.1073/pnas.1108754108

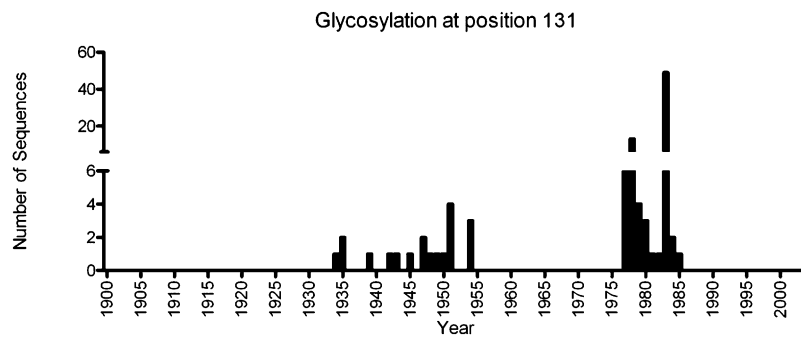

Fig. S1. Yearwise distribution of glycosylation at position 131 in circulating strains of H1N1 viruses in humans.

**Table S1. Presence of substitutions that increase receptor binding affinity of HA in circulating strains with glycosylation at position 131 of HA**

| Name     | Gly131 | Gly91(+/-5AA) | Gly162(+/-5AA) | Host  | Year | 156 | 186 | 193 | 194 | 225 |
|----------|--------|---------------|----------------|-------|------|-----|-----|-----|-----|-----|
| V01088   | YES    | NO            | NO             | Human | 1934 | E   | S   | N   | I   | D   |
| CY009324 | YES    | NO            | NO             | Human | 1935 | K   | S   | T   | L   | D   |
| CY020469 | YES    | NO            | NO             | Human | 1935 | K   | S   | T   | L   | D   |
| U02085   | YES    | NO            | NO             | Human | 1947 | E   | S   | T   | L   | G   |
| CY021701 | YES    | YES           | NO             | Human | 1950 | E   | S   | T   | L   | G   |
| CY009340 | YES    | NO            | NO             | Human | 1954 | E   | S   | T   | L   | G   |
| CY021053 | YES    | NO            | NO             | Human | 1954 | E   | S   | T   | L   | G   |
| CY021037 | YES    | YES           | NO             | Human | 1982 | E   | S   | T   | I   | D   |
| CY009276 | YES    | YES           | YES            | Human | 1942 | E   | S   | T   | L   | G   |
| CY020285 | YES    | YES           | YES            | Human | 1943 | E   | S   | T   | L   | G   |
| CY021709 | YES    | YES           | YES            | Human | 1945 | E   | S   | T   | L   | G   |
| CY009612 | YES    | YES           | YES            | Human | 1947 | E   | S   | T   | L   | G   |
| CY019947 | YES    | YES           | YES            | Human | 1948 | E   | S   | T   | L   | G   |
| CY019971 | YES    | YES           | YES            | Human | 1949 | E   | S   | T   | L   | G   |
| CY021821 | YES    | YES           | YES            | Human | 1951 | E   | S   | T   | L   | G   |
| CY021901 | YES    | YES           | YES            | Human | 1951 | E   | S   | T   | L   | G   |
| CY022021 | YES    | YES           | YES            | Human | 1951 | E   | S   | T   | L   | G   |
| CY022093 | YES    | YES           | YES            | Human | 1951 | E   | S   | T   | L   | G   |
| M38312   | YES    | YES           | YES            | Human | 1954 | E   | S   | T   | I   | G   |
| CY009284 | YES    | YES           | YES            | Human | 1977 | E   | S   | T   | I   | G   |
| CY009292 | YES    | YES           | YES            | Human | 1977 | E   | S   | T   | I   | G   |
| CY010372 | YES    | YES           | YES            | Human | 1977 | E   | S   | T   | I   | G   |
| CY020573 | YES    | YES           | YES            | Human | 1977 | E   | S   | T   | I   | G   |
| DQ508897 | YES    | YES           | YES            | Human | 1977 | E   | S   | T   | I   | G   |
| K01330   | YES    | YES           | YES            | Human | 1977 | E   | S   | T   | I   | G   |
| CY010868 | YES    | YES           | YES            | Human | 1978 | E   | S   | T   | I   | G   |
| CY010876 | YES    | YES           | YES            | Human | 1978 | E   | S   | T   | I   | G   |
| CY010884 | YES    | YES           | YES            | Human | 1978 | E   | S   | T   | I   | G   |
| CY010892 | YES    | YES           | YES            | Human | 1978 | E   | S   | T   | I   | G   |
| CY010900 | YES    | YES           | YES            | Human | 1978 | E   | S   | T   | I   | G   |
| CY011296 | YES    | YES           | YES            | Human | 1978 | E   | S   | T   | I   | G   |
| CY017363 | YES    | YES           | YES            | Human | 1978 | E   | S   | T   | I   | G   |
| CY019963 | YES    | YES           | YES            | Human | 1978 | E   | S   | T   | I   | D   |
| CY020165 | YES    | YES           | YES            | Human | 1978 | E   | S   | T   | I   | D   |
| CY020293 | YES    | YES           | YES            | Human | 1978 | E   | S   | T   | I   | G   |
| CY021717 | YES    | YES           | YES            | Human | 1978 | E   | S   | T   | I   | G   |
| CY021797 | YES    | YES           | YES            | Human | 1978 | E   | S   | T   | I   | G   |
| CY028724 | YES    | YES           | YES            | Human | 1978 | E   | S   | T   | I   | D   |
| CY019739 | YES    | YES           | YES            | Human | 1979 | E   | S   | T   | I   | Q   |
| CY021909 | YES    | YES           | YES            | Human | 1979 | E   | S   | T   | I   | G   |
| CY026411 | YES    | YES           | YES            | Human | 1979 | E   | S   | T   | I   | D   |
| M38353   | YES    | YES           | YES            | Human | 1979 | E   | S   | T   | I   | G   |
| CY010908 | YES    | YES           | YES            | Human | 1980 | E   | S   | T   | I   | D   |
| CY020181 | YES    | YES           | YES            | Human | 1980 | E   | S   | T   | I   | D   |
| CY020453 | YES    | YES           | YES            | Human | 1980 | E   | S   | T   | I   | D   |
| CY021029 | YES    | YES           | YES            | Human | 1981 | E   | S   | T   | I   | D   |
| AJ289702 | YES    | YES           | YES            | Human | 1983 | E   | S   | T   | I   | G   |
| CY010916 | YES    | YES           | YES            | Human | 1983 | E   | S   | T   | I   | N   |
| CY010924 | YES    | YES           | YES            | Human | 1983 | E   | S   | T   | I   | N   |
| CY010932 | YES    | YES           | YES            | Human | 1983 | E   | S   | T   | I   | N   |
| CY010940 | YES    | YES           | YES            | Human | 1983 | E   | S   | T   | I   | N   |
| CY010948 | YES    | YES           | YES            | Human | 1983 | E   | S   | T   | I   | N   |
| CY010956 | YES    | YES           | YES            | Human | 1983 | E   | S   | T   | I   | N   |
| CY010964 | YES    | YES           | YES            | Human | 1983 | E   | S   | T   | I   | N   |
| CY010972 | YES    | YES           | YES            | Human | 1983 | E   | S   | T   | I   | N   |
| CY010980 | YES    | YES           | YES            | Human | 1983 | E   | S   | T   | I   | N   |
| CY011304 | YES    | YES           | YES            | Human | 1983 | E   | S   | T   | I   | N   |
| CY011312 | YES    | YES           | YES            | Human | 1983 | E   | S   | T   | I   | N   |
| CY012440 | YES    | YES           | YES            | Human | 1983 | E   | S   | T   | I   | N   |
| CY012880 | YES    | YES           | YES            | Human | 1983 | E   | S   | T   | I   | G   |
| CY012888 | YES    | YES           | YES            | Human | 1983 | E   | S   | T   | I   | N   |
| CY013295 | YES    | YES           | YES            | Human | 1983 | E   | S   | T   | I   | N   |

**Table S1. Cont.**

| Name     | Gly131 | Gly91(+/-5AA) | Gly162(+/-5AA) | Host  | Year | 156 | 186 | 193 | 194 | 225 |
|----------|--------|---------------|----------------|-------|------|-----|-----|-----|-----|-----|
| CY013879 | YES    | YES           | YES            | Human | 1983 | E   | S   | T   | I   | N   |
| CY015524 | YES    | YES           | YES            | Human | 1983 | E   | S   | T   | I   | D   |
| CY017195 | YES    | YES           | YES            | Human | 1983 | E   | S   | T   | I   | N   |
| CY017203 | YES    | YES           | YES            | Human | 1983 | E   | S   | T   | I   | N   |
| CY017211 | YES    | YES           | YES            | Human | 1983 | E   | S   | T   | I   | N   |
| CY017219 | YES    | YES           | YES            | Human | 1983 | E   | S   | T   | I   | N   |
| CY017227 | YES    | YES           | YES            | Human | 1983 | E   | S   | T   | I   | N   |
| CY017235 | YES    | YES           | YES            | Human | 1983 | E   | S   | T   | I   | N   |
| CY017243 | YES    | YES           | YES            | Human | 1983 | E   | S   | T   | I   | N   |
| CY017251 | YES    | YES           | YES            | Human | 1983 | E   | S   | T   | I   | N   |
| CY017419 | YES    | YES           | YES            | Human | 1983 | E   | S   | T   | I   | N   |
| CY017427 | YES    | YES           | YES            | Human | 1983 | E   | S   | T   | I   | N   |
| CY017435 | YES    | YES           | YES            | Human | 1983 | E   | S   | T   | I   | N   |
| CY017869 | YES    | YES           | YES            | Human | 1983 | E   | S   | T   | I   | N   |
| CY017877 | YES    | YES           | YES            | Human | 1983 | E   | S   | T   | I   | N   |
| CY019037 | YES    | YES           | YES            | Human | 1983 | E   | S   | T   | I   | N   |
| CY019045 | YES    | YES           | YES            | Human | 1983 | E   | S   | T   | I   | N   |
| CY019053 | YES    | YES           | YES            | Human | 1983 | E   | S   | T   | I   | N   |
| CY019061 | YES    | YES           | YES            | Human | 1983 | E   | S   | T   | I   | N   |
| CY019069 | YES    | YES           | YES            | Human | 1983 | E   | S   | T   | I   | N   |
| CY019077 | YES    | YES           | YES            | Human | 1983 | E   | S   | T   | I   | N   |
| CY019085 | YES    | YES           | YES            | Human | 1983 | E   | S   | T   | I   | N   |
| CY019093 | YES    | YES           | YES            | Human | 1983 | E   | S   | T   | I   | N   |
| CY019221 | YES    | YES           | YES            | Human | 1983 | E   | S   | T   | I   | N   |
| CY019229 | YES    | YES           | YES            | Human | 1983 | E   | S   | T   | I   | N   |
| CY019237 | YES    | YES           | YES            | Human | 1983 | E   | S   | T   | I   | N   |
| CY019755 | YES    | YES           | YES            | Human | 1983 | E   | S   | T   | I   | G   |
| CY019763 | YES    | YES           | YES            | Human | 1983 | E   | S   | T   | I   | N   |
| CY020189 | YES    | YES           | YES            | Human | 1983 | E   | S   | T   | I   | D   |
| CY020237 | YES    | YES           | YES            | Human | 1983 | E   | S   | T   | I   | N   |
| CY020437 | YES    | YES           | YES            | Human | 1983 | E   | S   | T   | I   | N   |
| CY027531 | YES    | YES           | YES            | Human | 1983 | E   | S   | T   | I   | N   |
| X17221   | YES    | YES           | YES            | Human | 1983 | E   | S   | T   | I   | D   |
| CY020485 | YES    | YES           | YES            | Human | 1984 | E   | S   | T   | I   | D   |
| CY021725 | YES    | YES           | YES            | Human | 1984 | E   | S   | T   | I   | D   |
| Z54286   | YES    | YES           | YES            | Human | 1985 | E   | S   | T   | I   | G   |

Presence of substitutions that increase receptor binding affinity of HA in circulating strains with a glycosylation site at position 131 of HA. Full-length H1 HA sequences of human viruses (1640) downloaded from the NCBI influenza virus resource and analyzed for glycosylation in the globular domain using NetNGlyc prediction of glycosylation sites (Asn-Xaa-Ser/Thr, where Xaa is any amino acid except Pro). Out of the 98 sequences that have glycosylation at position 131, only 6 have lone glycosylation at position 131. Sequences were analyzed for substitutions at five key positions (156, 186, 193, 194, 225) that experimentally increase receptor-binding avidity in PR8; amino acids are indicated using single letter code.
